# Supplementary material for: 3D hierarchical mesoporous NiCo2S4@Ni(OH)2 core–shell nanosheet arrays for high performance supercapacitors
Source: Royal Society of Chemistry journal article supplement (doi:10.1039/c6nj00267f), 2016-01-01
Supplement: c6nj00267f1.pdf [file c6nj00267f1.pdf]

Supplementary Information for New Journal of Chemistry

**3D hierarchical mesoporous NiCo<sub>2</sub>S<sub>4</sub>@Ni(OH)<sub>2</sub> core-shell nanosheet arrays for high performance supercapacitors**

Van Hoa Nguyen,<sup>a,b</sup> Charmaine Lamiel<sup>a</sup> and Jae-Jin Shim<sup>a,\*</sup>

<sup>a</sup>*School of Chemical Engineering, Yeungnam University, Gyeongsan, Gyeongbuk, 712-749, Republic of Korea.*

<sup>b</sup>*Department of Chemistry, Nha Trang University, 2 Nguyen Dinh Chieu, Nha Trang, Vietnam.*

\* Tel: +82-53-810-2587; Fax: +82-53-810-2587; E-mail address: [jjshim@yu.ac.kr](mailto:jjshim@yu.ac.kr).

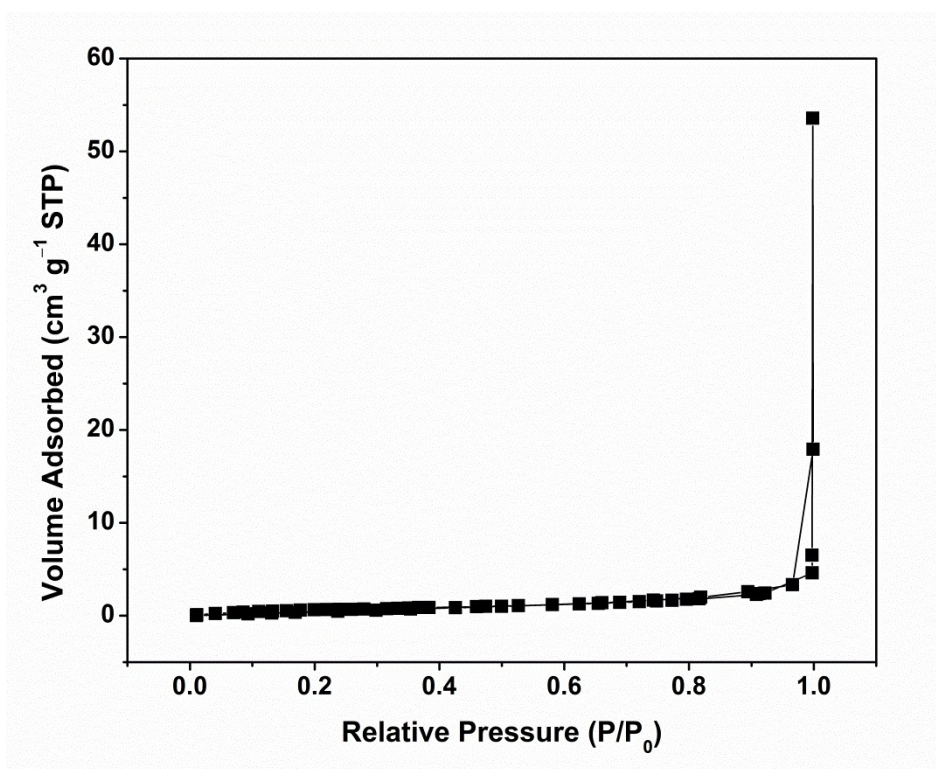

Figure S1. Nitrogen adsorption/desorption isotherm of the CC/NiCo<sub>2</sub>S<sub>4</sub>@Ni(OH)<sub>2</sub>-5 electrode. The surface area for this electrode was calculated from the adsorption isotherm by the Brunauer-Emmett-Teller (BET) method. The tested BET surface area is 3.2 m<sup>2</sup> g<sup>-1</sup>.

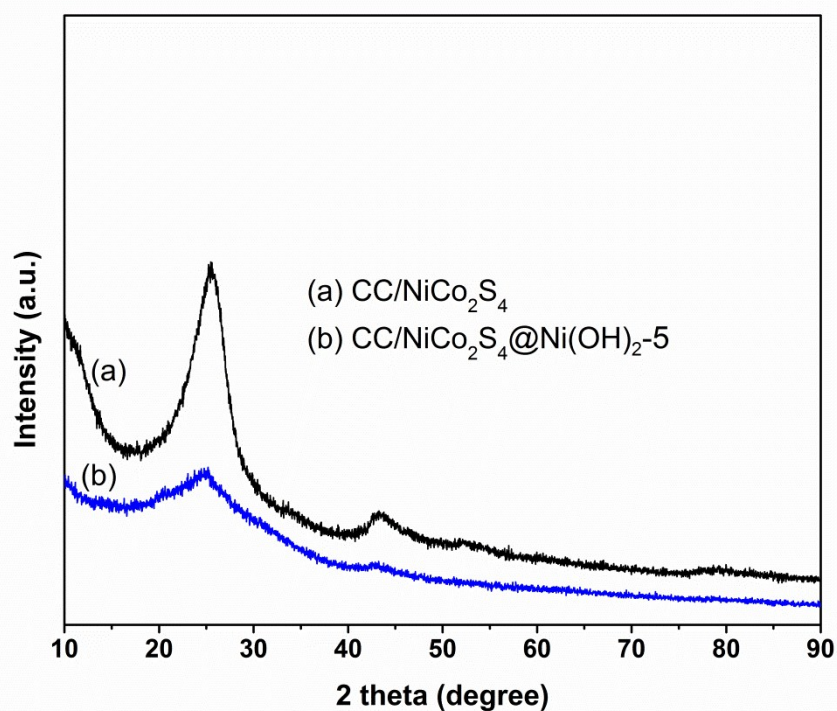

Figure S2. XRD patterns of CC/NiCo<sub>2</sub>S<sub>4</sub> and CC/NiCo<sub>2</sub>S<sub>4</sub>@Ni(OH)<sub>2</sub>-5 electrodes. The XRD spectra did not show clear diffraction peaks of NiCo<sub>2</sub>S<sub>4</sub> and NiCo<sub>2</sub>S<sub>4</sub>@Ni(OH)<sub>2</sub>-5 because the very thin layers of these materials were coated on the surface of the carbon clothes. The intensity of carbon at 2θ 26° and 44° in CC/NiCo<sub>2</sub>S<sub>4</sub>@Ni(OH)<sub>2</sub>-5 was lower than that in NiCo<sub>2</sub>S<sub>4</sub>, indicating the coating of Ni(OH)<sub>2</sub> layers.
